# Supplementary material
Source: MDPI journal article supplement (https://www.mdpi.com/1999-4907/14/6/1245)
Supplement: s1 [file s1]

Table S1 Percentage of different forms of Pb in *P. fortunei*

| Pb<br>concentration<br>(mg·L <sup>-1</sup> ) | FE (%)      | FW (%)        | FNaCl (%)   | FHAc (%)    | FHCl (%)    | FR (%)     |
|----------------------------------------------|-------------|---------------|-------------|-------------|-------------|------------|
| 50                                           | 4.50±1.54a  | 6.30±1.04c    | 17.13±3.87a | 44.00±6.11a | 25.30±5.38a | 4.10±1.93a |
| 100                                          | 5.83±1.83a  | 7.90±1.44c    | 18.87±4.39a | 41.37±6.23a | 21.07±5.67a | 4.97±2.18a |
| 200                                          | 7.03±2.39a  | 9.63±1.68bc   | 20.63±3.92a | 39.93±5.99a | 19.63±5.48a | 3.13±1.85a |
| 400                                          | 8.07±2.76a  | 10.53±1.62abc | 21.57±4.13a | 38.33±6.23a | 18.40±5.67a | 3.10±1.65a |
| 600                                          | 10.17±2.87a | 12.97±1.66ab  | 22.60±4.11a | 35.33±6.23a | 15.33±5.61a | 3.60±1.33a |
| 800                                          | 10.17±1.38a | 14.87±1.54a   | 24.47±4.68a | 31.47±6.25a | 13.73±6.29a | 5.30±2.88a |

Note: Data are mean ± standard deviation. Different letters in the same column indicate significant differences in the percentage of Pb concentrations in *P. fortunei* under different treatments (P<0.05).

Note: FE represents Pb inorganic; FW represents Pb organic; FNaCl represents pectin and protein bound Pb; FHAc represents Pb phosphate; FHCl represents Pb oxalate; FR represents Pb residual state.
